# Supplementary material for: A Systematic Review and Network Meta-Analysis on the Efficacy of Medications in the Treatment of Chronic Idiopathic Constipation in Japan
Source: Gastroenterol Res Pract. 2021 Nov 30;2021:5534687. doi: 10.1155/2021/5534687 (PMC8651382; doi:10.1155/2021/5534687)
Supplement: Supplementary Materials — The supplementary files contain the following information: the detailed search strategies, the funnel plots, and the PRISMA checklist. [file 5534687.f1.zip]

Archive with 2 entries (2 files):
- PRISMA_2020_checklist_cic_nma_AtsushiNakajima.docx
- Supplementary_20210130_cic_nma_AtsushiNakajima_rev28Sep2021.docx
